# Supplementary material
Source: MDPI journal article supplement (https://www.mdpi.com/2072-4292/13/24/5110)
Supplement: s1 [file s1]

Archive with 2 entries (2 files):
- Figure S1-Wind speed bias for CYGNSS NOAA V1.1 winds compared to WindSat all-weather winds, WindSat rain-free only, and SMAP, all wind regimes.png
- Table S1.pdf
