# Supplementary material
Source: MDPI journal article supplement (https://www.mdpi.com/2072-4292/13/24/5110)
Supplement: s1 [file s1 › Table S1.pdf]

**Table S1:** List of storms and sample days included in the database for the comparisons of CYGNSS L2 winds versus radiometers. This database was built selecting sample days from intense storms for which there were good collocations for CYGNSS wind field and the microwave radiometers.

| Storm Name | Basin            | Year | Case Studies                              |
|------------|------------------|------|-------------------------------------------|
| Irma       | Atlantic         | 2017 | 31 August<br>2-5 September                |
| Jose       | Atlantic         | 2017 | 6-7, 9-10, 12, 14,<br>16-18, 20 September |
| Maria      | Atlantic         | 2017 | 17, 19, 21-26, 28<br>September            |
| Jebi       | Western Pacific  | 2018 | 28-29 August<br>1-3 September             |
| Mangkhut   | Western Pacific  | 2018 | 7, 9, 12, 14-15<br>September              |
| Florence   | Atlantic         | 2018 | 9-13 September                            |
| Dorian     | Atlantic         | 2019 | 28, 30-31 August<br>1, 4, 7 September     |
| Hagibis    | Western Pacific  | 2019 | 9-13 October                              |
| Uesi       | Southern Pacific | 2020 | 11-13 February                            |
| Harold     | Southern Pacific | 2020 | 4-7, 9 April                              |
| Amphan     | Indian           | 2020 | 18-19 May                                 |
| Laura      | Atlantic         | 2020 | 26 August                                 |
| Maysak     | Western Pacific  | 2020 | 28, 30-31 August<br>1 September           |
| Hayshen    | Western Pacific  | 2020 | 1-5 September                             |
| Paulette   | Atlantic         | 2020 | 9-13, 15-16 September                     |
| Teddy      | Atlantic         | 2020 | 16-20, 22 September                       |
| Delta      | Atlantic         | 2020 | 6, 8-9 October                            |
